# Supplementary material for: The Photodynamic Properties and the Genotoxicity of Heat-Treated Silicalite-1 Films
Source: PubMed Central journal article supplement (PMC6416588; doi:10.3390/ma12040567), 2019-02-14
Supplement: materials-12-00567-s001.pdf [file materials-12-00567-s001.pdf]

*Supplementary Information*

# **The Photodynamic Properties and the Genotoxicity of Heat-Treated Silicalite-1 Films**

**Ivan Jirka <sup>1,\*</sup>, Ivana Kopová <sup>2</sup>, Pavel Kubát <sup>1</sup>, Edyta Tabor <sup>1</sup>, Lucie Bačáková <sup>2</sup>, Milan Bouša <sup>1</sup> and Petr Sajdl <sup>3</sup>**

<sup>1</sup> J. Heyrovský Institute of Physical Chemistry of the Czech Academy of Sciences, v.v.i., Dolejškova 3, Prague 8, 182 23, Czech Republic; pavel.kubat@jh-inst.cas.cz (P.K.); Edyta.Tabor@jh-inst.cas.cz (E.T.); Milan.Bousa@jh-inst.cas.cz (M.B.)

<sup>2</sup> Institute of Physiology of the Czech Academy of Sciences, v.v.i., Vídeňská 1083, Prague 4, 142 20, Czech Republic; ivana.kopova@biomed.cas.cz (I.K.); Lucie.Bacakova@fgu.cas.cz (L.B.)

<sup>3</sup> Power Engineering Department, University of Chemistry and Technology, Technická 3, Prague 6, 166 28, Czech Republic; Petr.Sajdl@vscht.cz

\* Correspondence: ivan.jirka@jh-inst.cas.cz

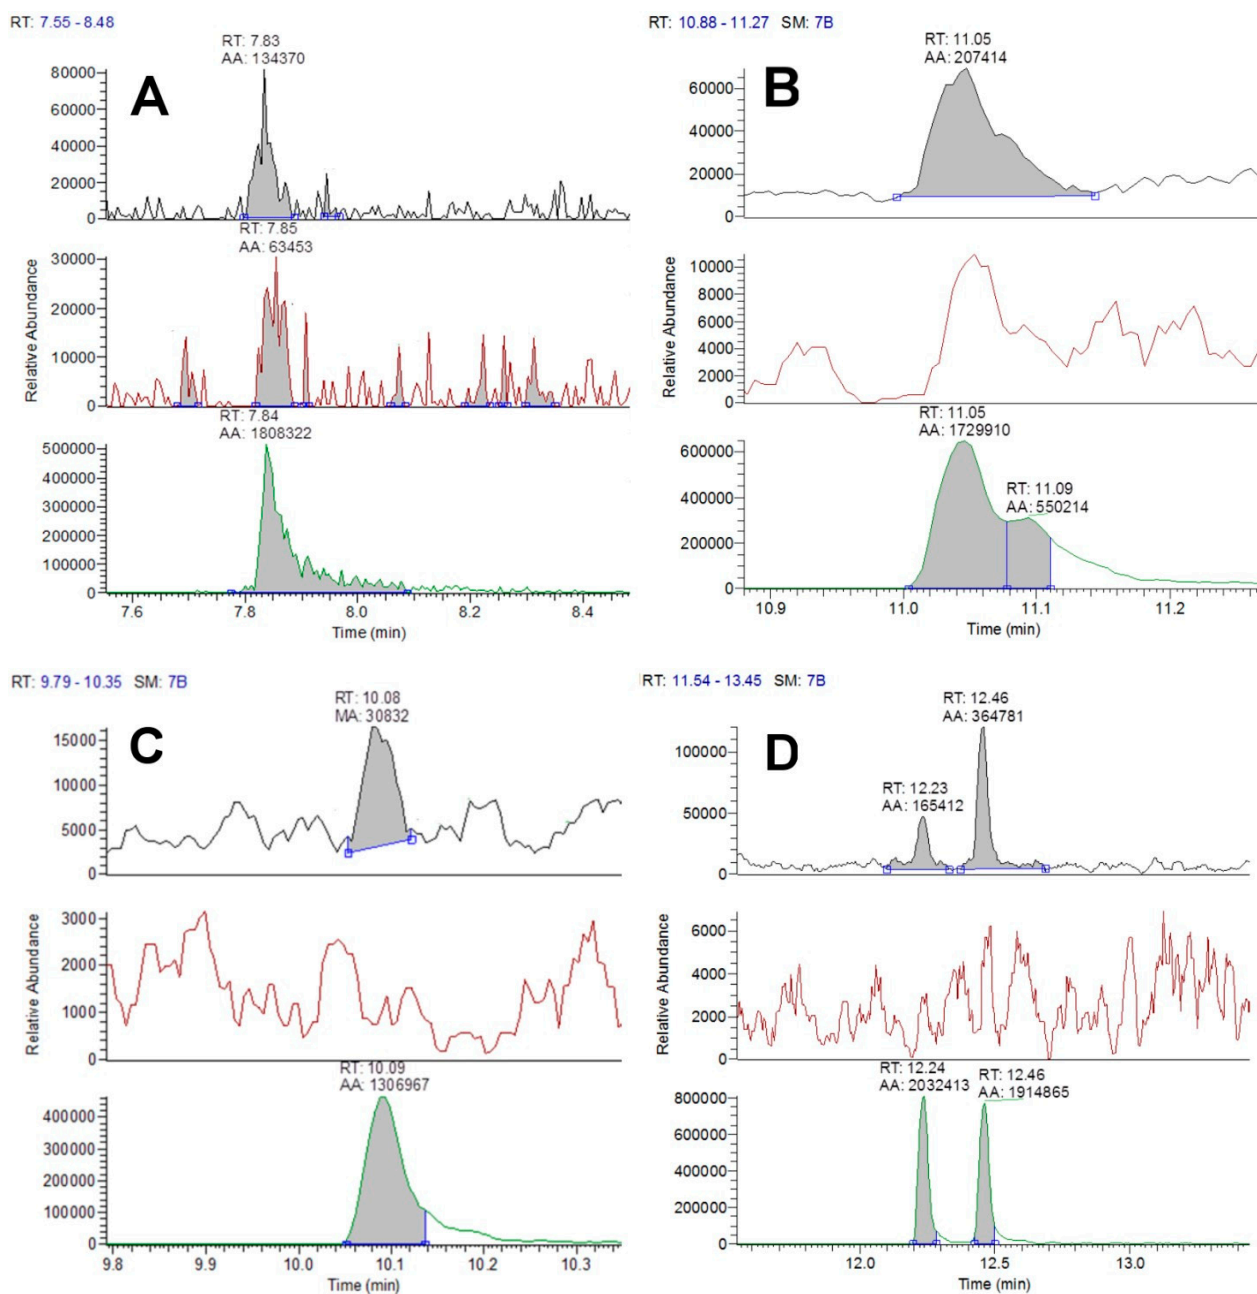

**Figure S1.** Chromatograms obtained by DTD-GC-MS analysis of *SC-500*: naphthalene (A), phenanthrene and anthracene (B), fluorene (C), fluoranthene and pyrene (D). The top in every panel: sample before evacuation, middle: sample evacuated at RT, bottom: standard (Supelco).

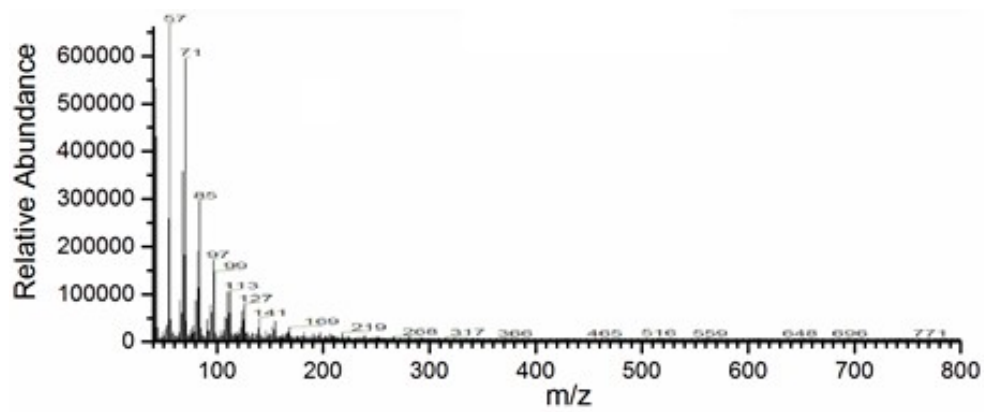

Figure S2. Mass spectrum of hydrocarbon fractions of the chloroform extract of SC-500.

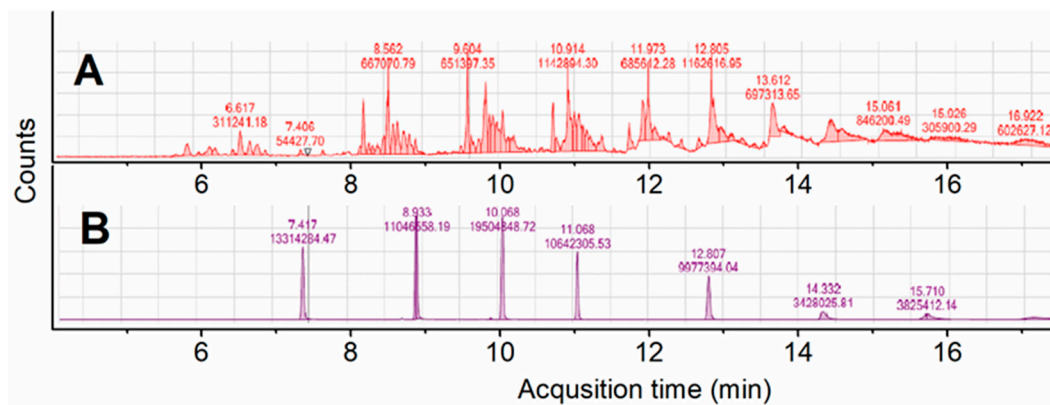

**Figure S3.** Chromatogram of hydrocarbon fractions of the chloroform extract of sample *SC-500* (panel A) compared with the standard mixture of *n*-alkanes (panel B).

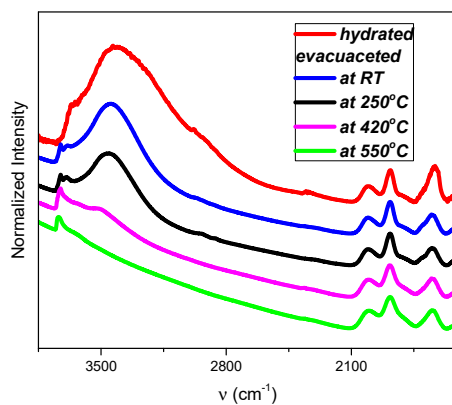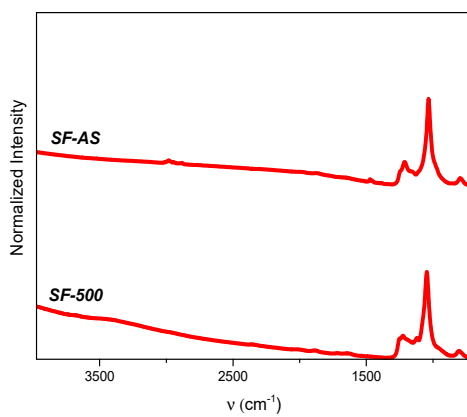

Figure S4. FTIR spectra of the sample SC-500 (A) and SF-AS, SF-500 (B).

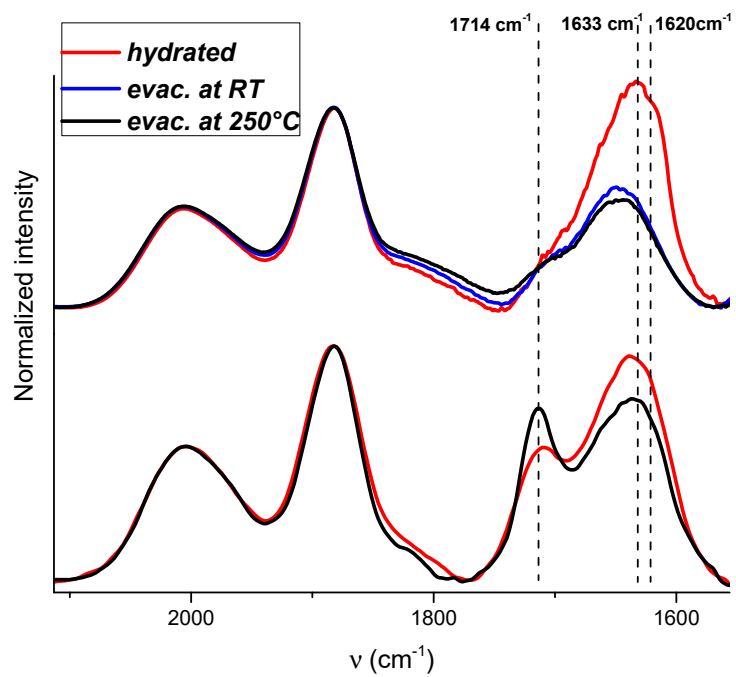

**Figure S5.** Overtone region of infrared absorption spectra of *SC-500* (top) and *SF-500* (bottom). The spectra of hydrated and evacuated samples at RT and 250°C are distinguished.

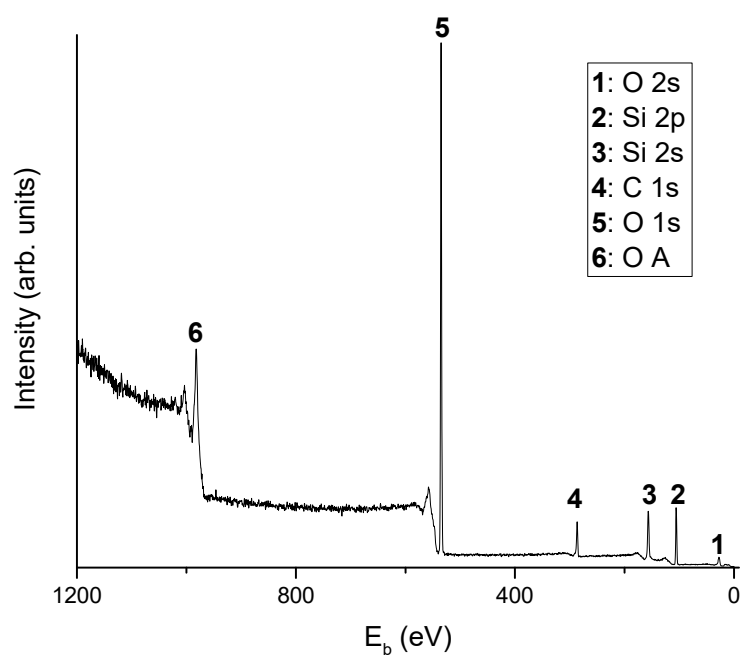

**Figure S6.** Survey photoelectron spectrum of the sample *SF-500* composed solely from Si, O, C and in the case of non-calcinated sample also from N.
